# Supplementary material for: Non-Destructive Monitoring via Electrochemical NADH Detection in Murine Cells
Source: MDPI journal article supplement (doi:10.3390/bios12020107), 2022-02-10
Supplement: s1 [file s1]

# Supplementary Materials: Non-Destructive Monitoring Via Electrochemical NADH Detection in Murine Cells

Ju Kyung Lee <sup>1</sup>, Han Na Suh <sup>2</sup>, Sung Hoon Yoon <sup>2,3</sup>, Kyu Hong Lee <sup>2</sup>, Sae Young Ahn <sup>4,5</sup>, Hyung Jin Kim <sup>6</sup>, Sang Hee Kim <sup>1,\*</sup>

<sup>1</sup> Department of Medical IT Convergence, Kumoh National Institute of Technology, Gumi 39177, Korea; chejueyes@kumoh.ac.kr

<sup>2</sup> Korea Institute of Toxicology, Jeongeup 56212, Korea; hanna.suh@kitox.re.kr (H.N.S.); seonghoon.yoon@kitox.re.kr (S.H.Y.); khlee@kitox.re.kr (K.H.L.)

<sup>3</sup> Department of Human and Environmental Toxicology, University of Science & Technology, Daejeon 34113, Korea

<sup>4</sup> NDD Inc., Gumi 39253, Korea; sahn@nnd-inc.com

<sup>5</sup> Fuzbien Technology Institute, Rockville, MD 20850, USA

<sup>6</sup> Digital Health Care Research Center, Gumi Electronics and Information Technology Research Institute (GERI), Gumi 39253; hjkim745@geri.re.kr

\* Correspondence: shkim@kumoh.ac.kr

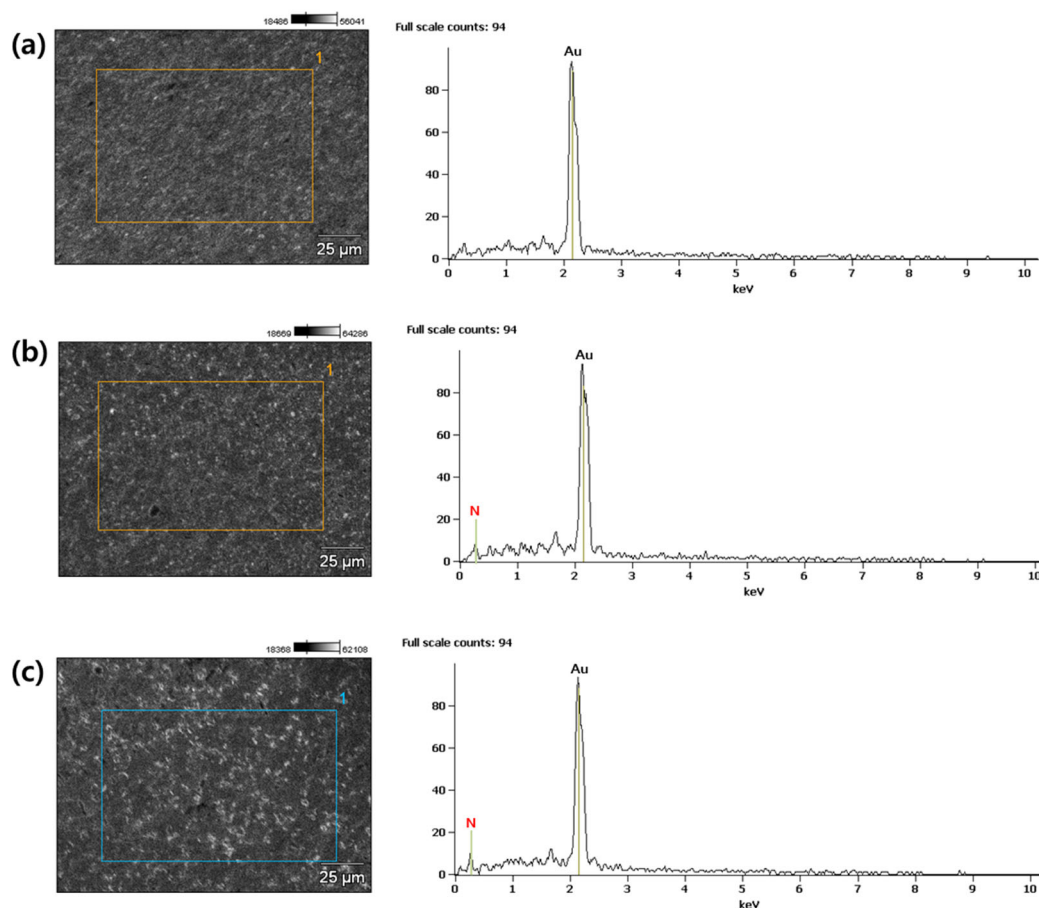

**Figure S1.** EDAX spectrum of (a) bare, (b) 4-ATP modified, (c) NPQD modified electrode.

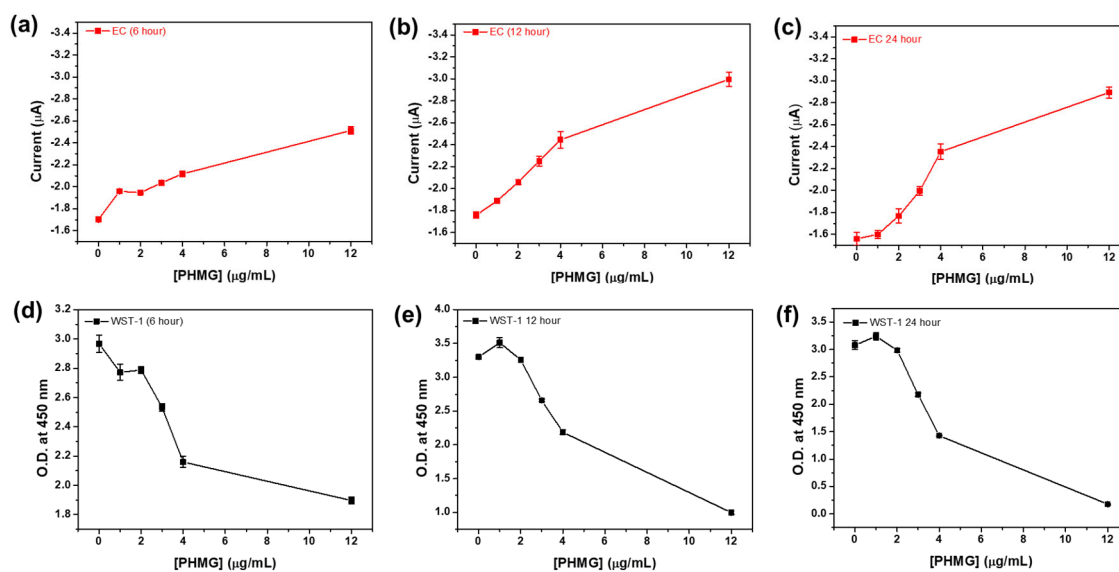

**Figure S2.** The electrocatalytic (a–c) and conventional WST-1 (d–f) sensing data for cell viability monitoring. PHMG was dosed for 6 hours (a,d), for 12 hours (b,e), for 24 hours (c,f).
